# Supplementary material for: TRIM28 multi-domain protein regulates cancer stem cell population in breast tumor development
Source: PubMed Central journal article supplement (PMC5352203; doi:10.18632/oncotarget.13273), 2016-11-10
Supplement: oncotarget-08-863-s001.pdf [file oncotarget-08-863-s001.pdf]

## TRIM28 multi-domain protein regulates cancer stem cell population in breast tumor development

### SUPPLEMENTARY FIGURES AND TABLES

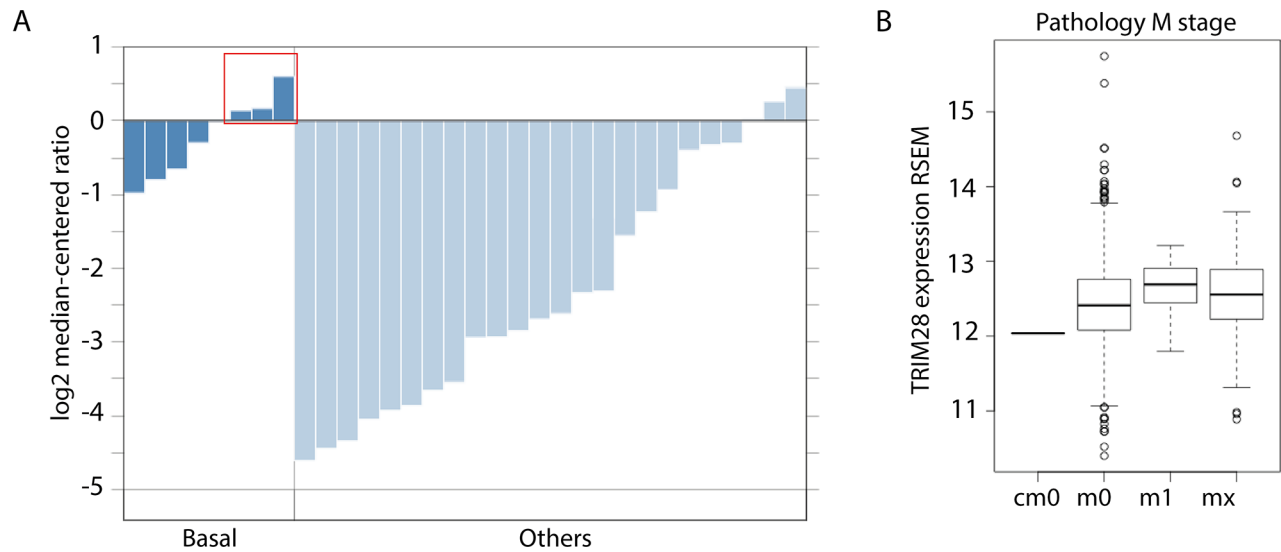

**Supplementary Figure S1: Association of *TRIM28* expression with aggressive breast cancer.** **A.** Elevated expression of *TRIM28* gene in basal (containing triple-negative BRCA) compared to other subtypes of breast cancer. **B.** *TRIM28* gene expression is distinct between different pathology M stages with the highest expression level in pathology M1 stage.

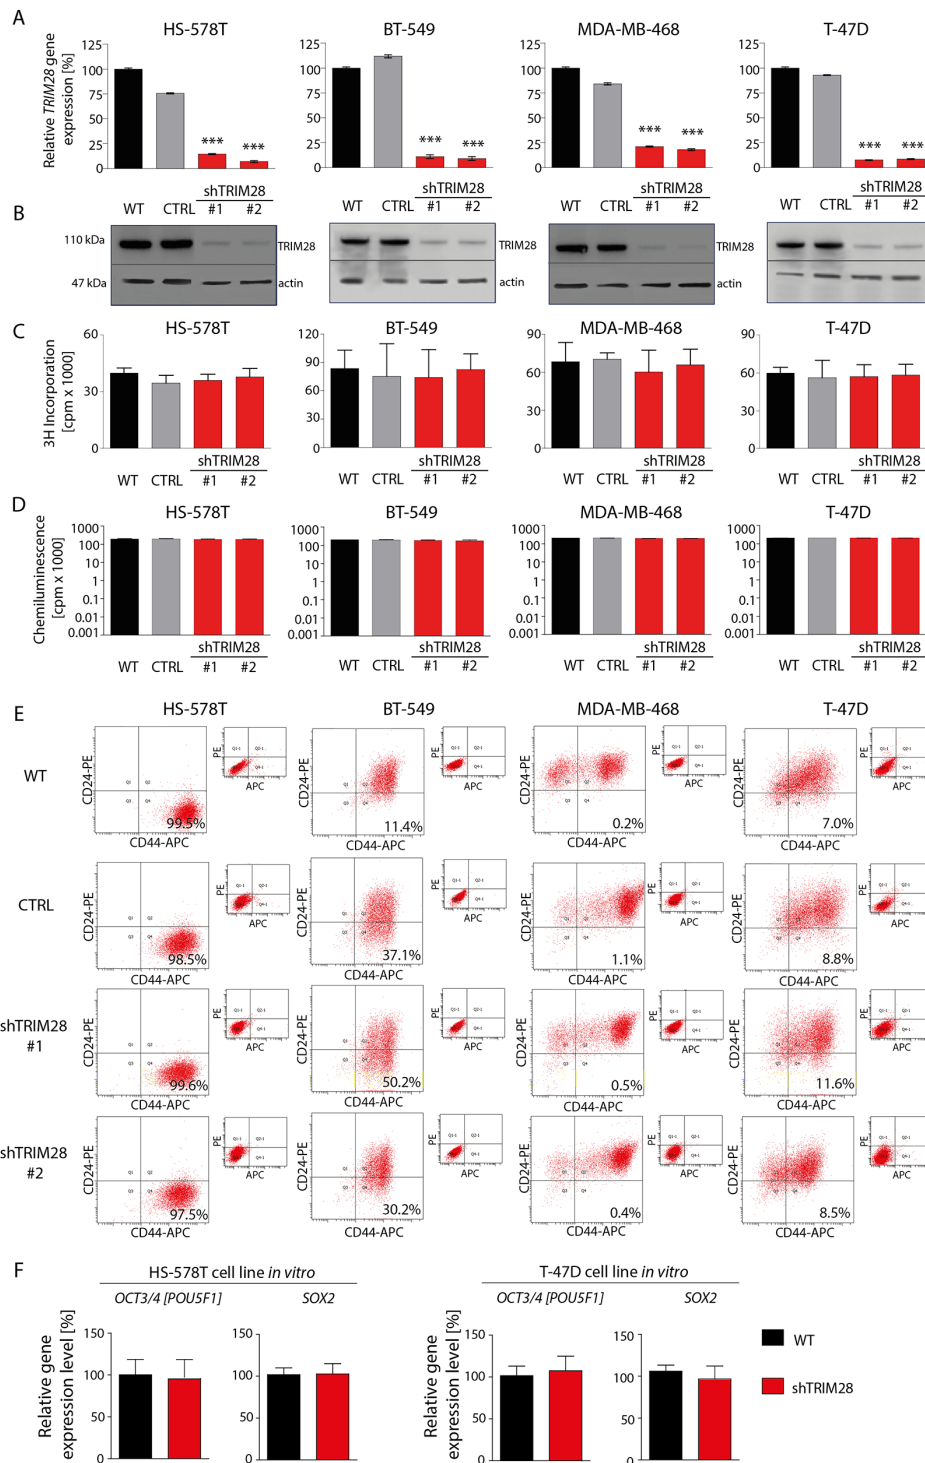

**Supplementary Figure S2: shRNA-mediated knockdown of *TRIM28* gene in a panel of 4 breast cancer cell lines. A, B.** After the transduction with *TRIM28* shRNA-mediating vectors, the cells from all four cell lines exhibited a decreased expression of *TRIM28* confirmed by RT-qPCR (A) and Western blot analysis (B). CTRL-empty vector. Error bars, SD; n = 3. **C, D.** *TRIM28* downregulation does not affect cell proliferation (C) and viability (D) *in vitro* as determined using an <sup>3</sup>H-thymidine-incorporation assay and ATPlite™ Luminescence Assay, respectively. Error bars, SD; n = 4; p > 0.05. **E.** The comparison of CD44<sup>+</sup>/CD24<sup>-low</sup> cells frequency in breast cancer cell lines upon reduction of *TRIM28* level *in vitro*. *TRIM28* knockdown does not affect the percentage of breast cancer stem cell population *in vitro*. **F.** *TRIM28* downregulation does not affect the expression of pluripotency markers *OCT3/4*, *SOX2* and *NANOG* *in vitro* in HS-578T (left panel) and T-47D (right panel) breast cancer cell lines as determined using RT-qPCR. Error bars, SD; n = 4; p > 0.05.

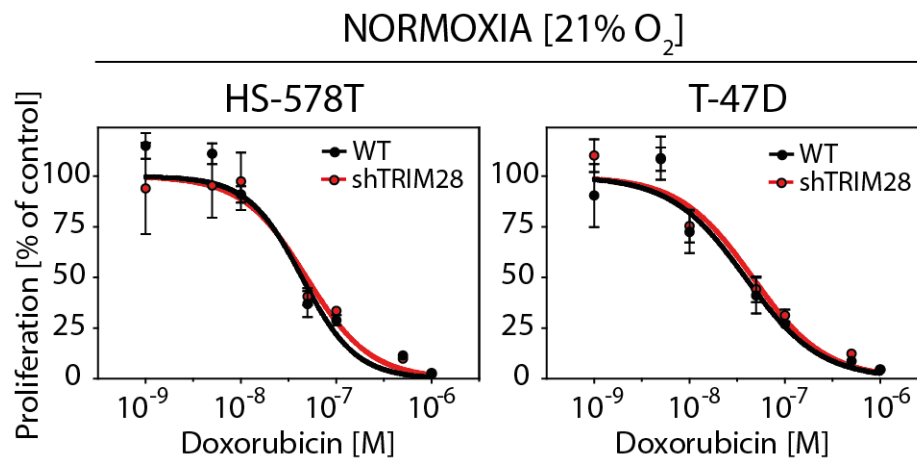

**Supplementary Figure S3: *TRIM28* knockdown does not affect the chemoresistance of HS-578T and T-47D breast cancer cell lines *in vitro*.** The dose response curves show the relative proliferation *in vitro* (<sup>3</sup>H-thymidine incorporation assay) of *TRIM28*<sup>WT</sup> and *TRIM28*<sup>KD</sup> (sh#1) cells after doxorubicin treatment in normoxia. Error bars, SD; n = 4; p > 0.05.

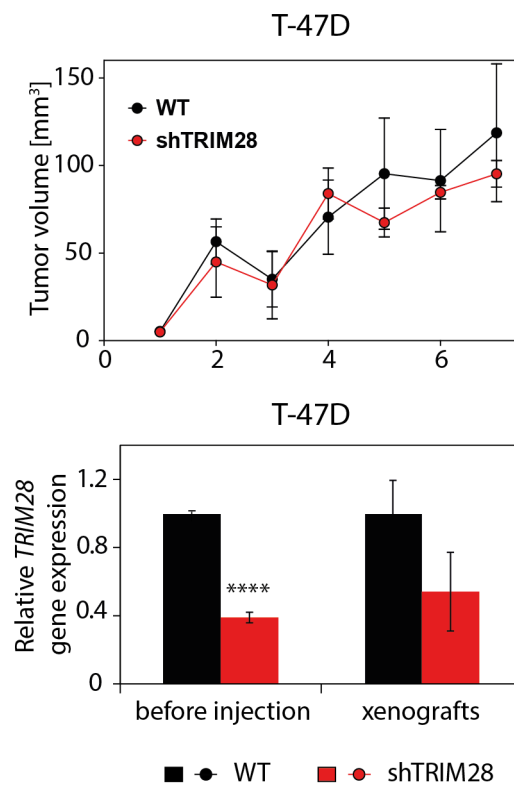

**Supplementary Figure S4: Kinetics of T-47D tumor growth in a xenograft mouse model.** Upper panel: *TRIM28*<sup>WT</sup> and *TRIM28*<sup>KD</sup> (sh#1) cells were subcutaneously injected into athymic nude mice, and tumor size was measured weekly for 7 weeks. Error bars, SEM. Bottom panel: *TRIM28* gene expression was downregulated in *TRIM28*<sup>KD</sup> (sh#1) xenografts, as confirmed by RT-qPCR. Error bars, SD; \*\*\*\* p < 0.0001.

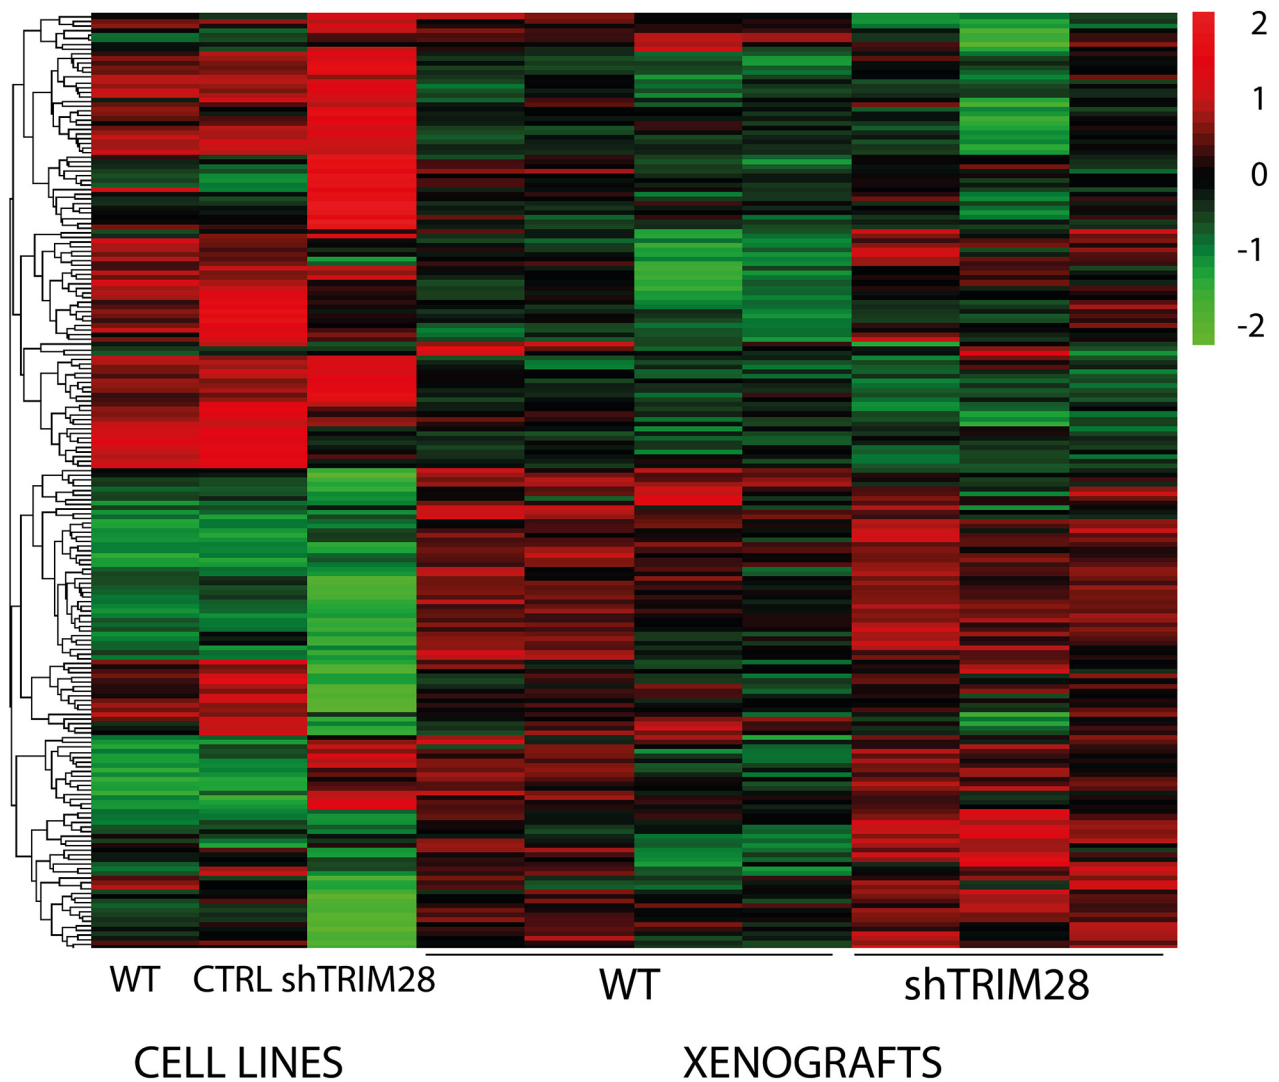

**Supplementary Figure S5: Heatmap of 200 top differentially expressed genes between MDA-MB-231 xenografts and MDA-MB-231 cell lines.** WT – non-modified cells/xenografts from non-modified cells; CTRL – MDA-MB-231 cells transduced with empty vector; shTRIM28 – MDA-MB-231 cells transduced with shTRIM28 encoding vector/xenografts from MDA-MB-231 cells with *TRIM28* knockdown.

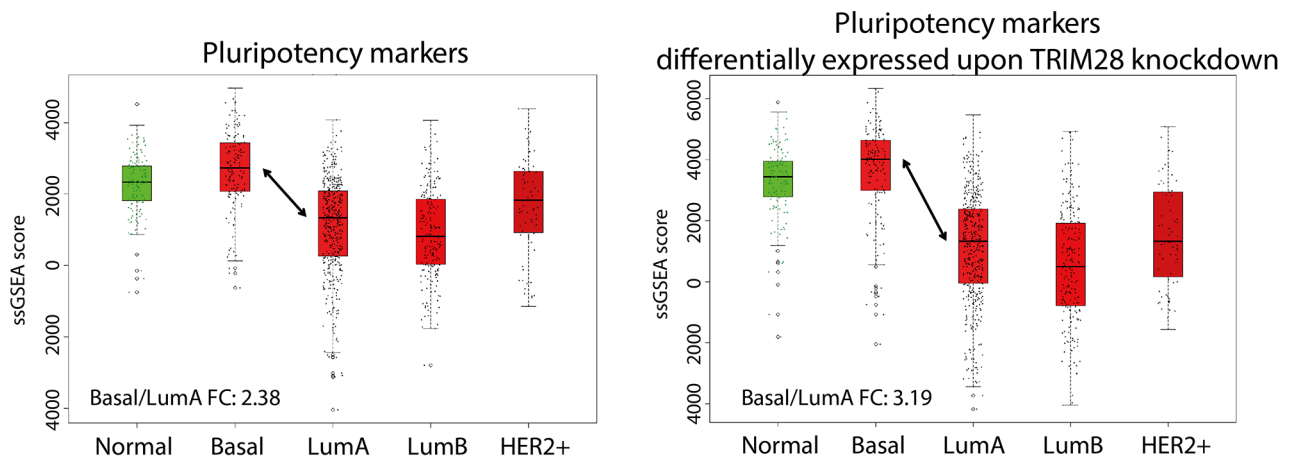

**Supplementary Figure S6: Pluripotency markers differentially expressed upon *TRIM28* knockdown have increased concordant expression in TCGA BRCA basal subtype. A.** Expression of selected pluripotency markers differs between intrinsic breast cancer subtypes. **B.** Six pluripotency markers differentially expressed upon *TRIM28* knockdown in xenografts (*OCT3/4*, *CXCR4*, *MMP1*, *ABCG2*, *LEF1*, *NOTCH4*, *PROM1*) have increased concordant expression in basal BRCA subtype and better distinguish highly aggressive basal to less aggressive luminal A subtype.

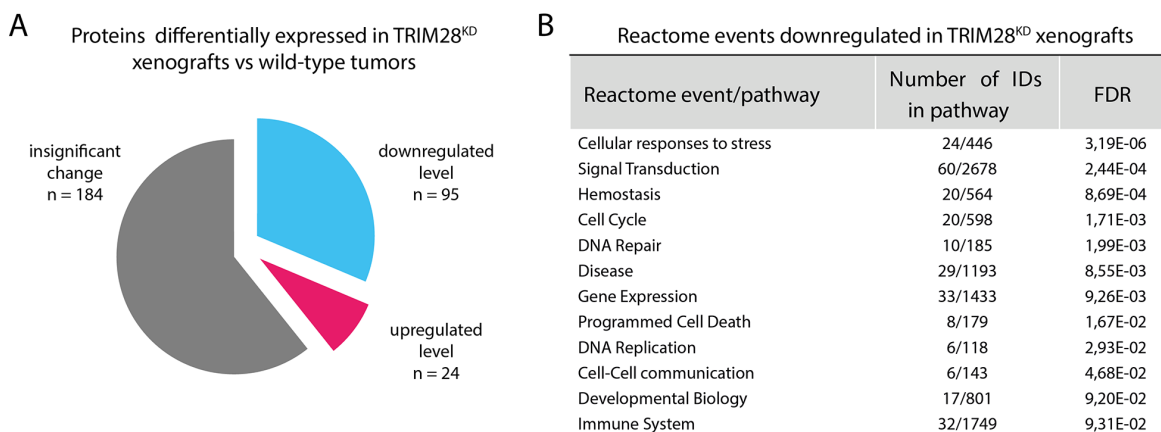

**C** Gene Ontology (GO) terms significantly overrepresented in a set of proteins upregulated in TRIM28<sup>WT</sup> xenografts

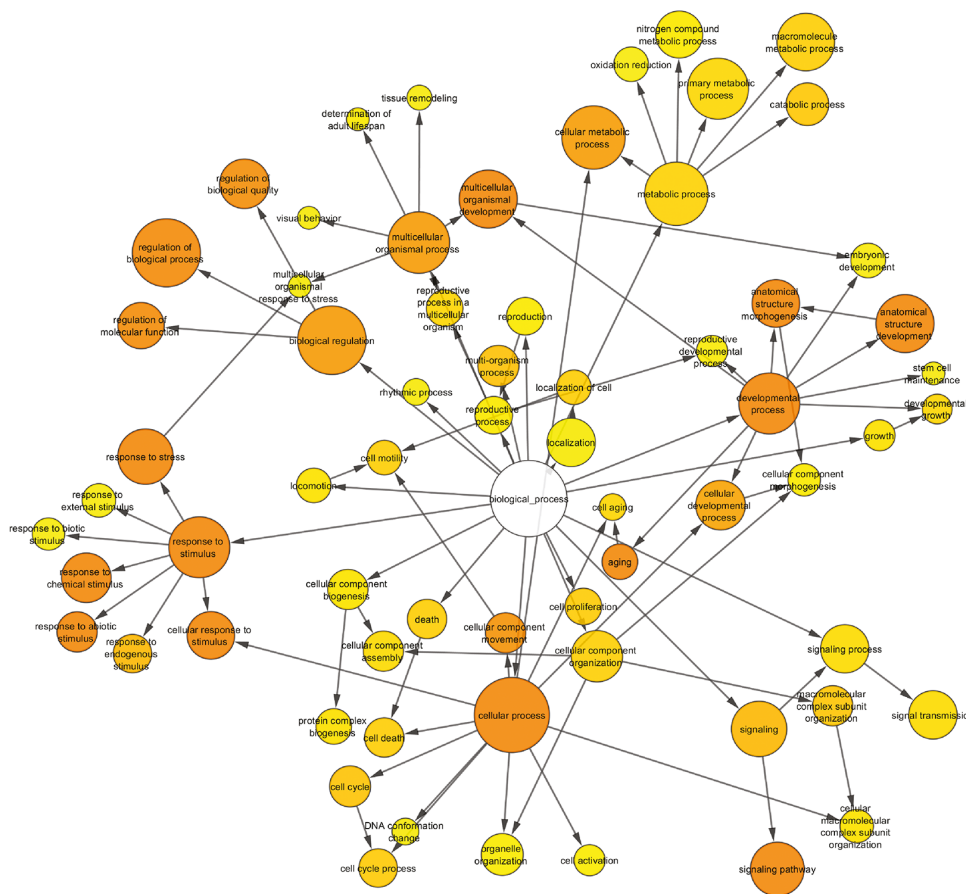

**Supplementary Figure S7: RPPA analysis revealed significant downregulation of events/mechanisms associated with cell cycle, cellular response to stress, signal transduction and metabolism upon TRIM28 gene knockdown. A.** Statistical analysis of RPPA results indicated a significant downregulation of 95 markers ( $p\text{-val} < 0.05$ ,  $FDR < 0.1$ ) and upregulation of 24 markers ( $p\text{-val} < 0.05$ ,  $FDR < 0.1$ ) in TRIM28<sup>KD</sup> (sh#1) xenografts when compared with TRIM28<sup>WT</sup> tumors. **B.** The biological events which are significantly downregulated in TRIM28<sup>KD</sup> (sh#1) xenografts ( $FDR < 0.1$ ) as determined using a free, open-source, curated and peer reviewed pathway database Reactome (www.reactome.org). **C.** Analysis of RPPA data with a Cytoscape plugin BiNGO (The Biological Networks Gene Ontology tool) confirmed overrepresentation of terms associated with Developmental processes, Cell cycle, Cellular response to stress and Signaling in TRIM28<sup>WT</sup> xenografts. Interestingly, overrepresentation of Metabolic processes in TRIM28<sup>WT</sup> tumors was observed.

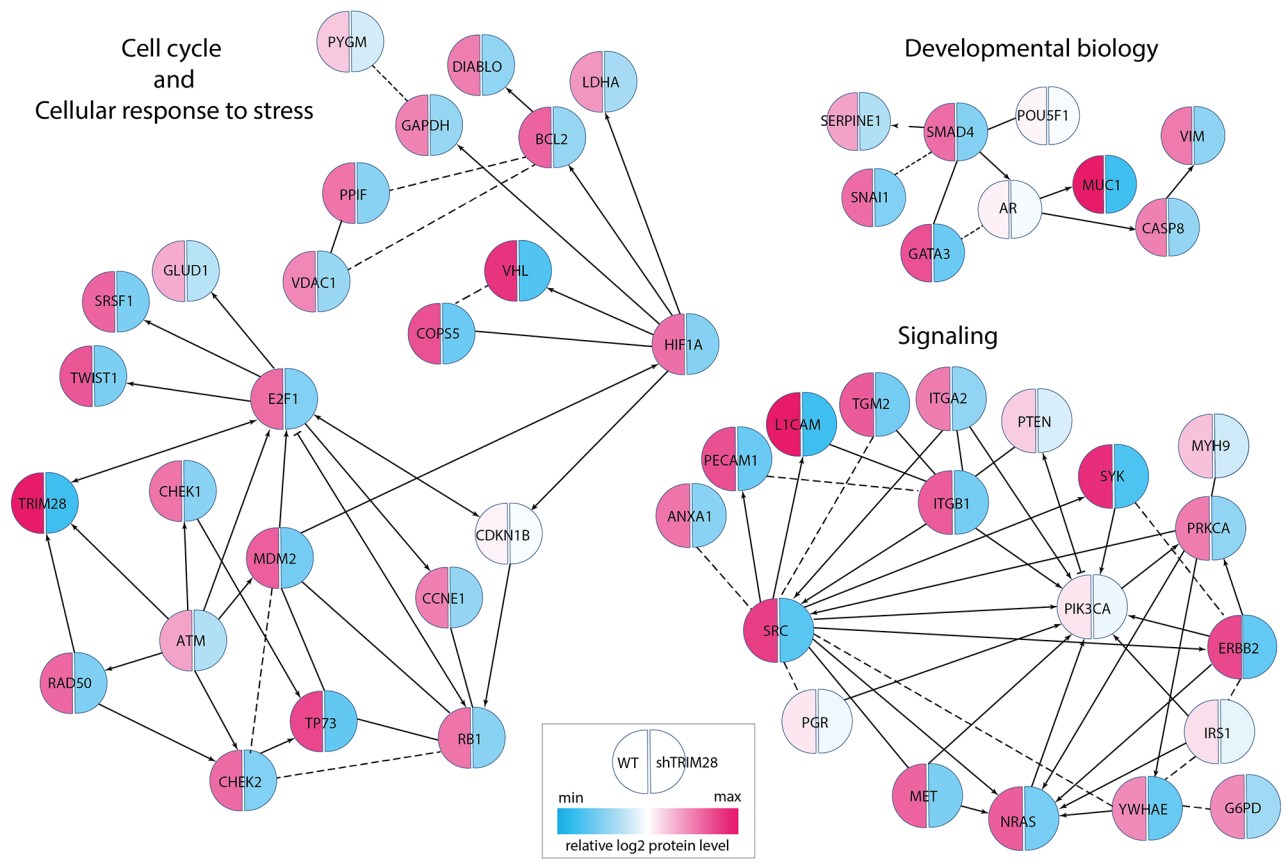

**Supplementary Figure S8: Functional Interaction Network of significantly differentially expressed markers between TRIM28<sup>WT</sup> and TRIM28<sup>KD</sup> xenografts based on RPPA data.** Visualization was prepared in Cytoscape ReactomeFIViz application. Blue = relative downregulation of protein level; Pink = relative upregulation of protein level.

**Supplementary Table S1: Summary of TRIM28 differential expression analysis from Oncomine database.**

**See Supplementary File 1**

**Supplementary Table S2: Summary of the RNA-Seq expression profiles of MDA-MB-231 cell lines and xenografts generated with control and TRIM28<sup>KD</sup> conditions.**

| No. | ID           | CELL LINE  | CONDITION                                                        | TOTAL PURITY<br>FILTERED READS |
|-----|--------------|------------|------------------------------------------------------------------|--------------------------------|
| 1   | IACS-TRIM-18 | MDA-MB-231 | Breast Cancer Cell Line WT<br><i>In Vitro</i>                    | 70217876                       |
| 2   | IACS-TRIM-19 | MDA-MB-231 | Breast Cancer Cell Line with<br>Vector Control <i>In Vitro</i>   | 52350514                       |
| 3   | IACS-TRIM-20 | MDA-MB-231 | Breast Cancer Cell Line with<br>TRIM28 Knockdown <i>In Vitro</i> | 69233840                       |
| 4   | IACS-TRIM-21 | MDA-MB-231 | Breast Cancer Xenograft WT1                                      | 81200800                       |
| 5   | IACS-TRIM-22 | MDA-MB-231 | Breast Cancer Xenograft WT2                                      | 70977614                       |
| 6   | IACS-TRIM-23 | MDA-MB-231 | Breast Cancer Xenograft WT3                                      | 61127350                       |
| 7   | IACS-TRIM-24 | MDA-MB-231 | Breast Cancer Xenograft WT4                                      | 87621906                       |
| 8   | IACS-TRIM-25 | MDA-MB-231 | Breast Cancer Xenograft TRIM28<br>Knockdown 1                    | 85849248                       |
| 9   | IACS-TRIM-26 | MDA-MB-231 | Breast Cancer Xenograft TRIM28<br>Knockdown 2                    | 83705362                       |
| 10  | IACS-TRIM-27 | MDA-MB-231 | Breast Cancer Xenograft TRIM28<br>Knockdown 3                    | 65253540                       |



Supplementary Table S3: Gene sets downregulated in TRIM28<sup>KD</sup> xenografts compared with control xenografts

| No. | NAME OF GENE SETS                                | SIZE | ES     | NES           | NOM p-val    | FDR q-val |
|-----|--------------------------------------------------|------|--------|---------------|--------------|-----------|
| 1   | SIGNALLING_BY_NGF                                | 34   | -0.338 | <b>-2.349</b> | <b>0.002</b> | 0.020     |
| 2   | GPCR_DOWNSTREAM_SIGNALING                        | 57   | -0.251 | <b>-2.234</b> | <b>0.002</b> | 0.022     |
| 3   | SIGNALING_BY_EGFR_IN_CANCER                      | 19   | -0.408 | <b>-2.125</b> | <b>0.004</b> | 0.035     |
| 4   | SIGNALING_BY_GPCR                                | 72   | -0.202 | <b>-2.010</b> | <b>0.008</b> | 0.056     |
| 5   | GASTRIN_CREB_SIGNALLING_PATHWAY_VIA_PKC_AND_MAPK | 24   | -0.329 | <b>-1.888</b> | <b>0.019</b> | 0.093     |
| 6   | SIGNALING_BY_ERBB2                               | 18   | -0.368 | <b>-1.872</b> | <b>0.004</b> | 0.085     |
| 7   | CLASS_A1_RHODOPSIN_LIKE_RECEPTORS                | 28   | -0.295 | <b>-1.859</b> | <b>0.011</b> | 0.078     |
| 8   | SIGNALING_BY_FGFR                                | 21   | -0.323 | <b>-1.788</b> | <b>0.028</b> | 0.098     |
| 9   | DOWNSTREAM_SIGNALING_OF_ACTIVATED_FGFR           | 21   | -0.323 | <b>-1.776</b> | <b>0.014</b> | 0.092     |
| 10  | G_ALPHA_Q_SIGNALLING_EVENTS                      | 21   | -0.321 | <b>-1.728</b> | <b>0.026</b> | 0.105     |
| 11  | SIGNALING_BY_FGFR_IN_DISEASE                     | 23   | -0.296 | <b>-1.676</b> | <b>0.035</b> | 0.124     |
| 12  | PEPTIDE_LIGAND_BINDING_RECEPTORS                 | 17   | -0.344 | <b>-1.670</b> | <b>0.029</b> | 0.117     |
| 13  | SIGNALING_BY_PDGF                                | 20   | -0.313 | <b>-1.669</b> | <b>0.030</b> | 0.109     |
| 14  | GPCR_LIGAND_BINDING                              | 41   | -0.216 | <b>-1.589</b> | <b>0.045</b> | 0.148     |

ES, GSEA enrichment score; NES, GSEA normalized enrichment score; FDR, false discovery rate. Only gene sets that show  $p < 0.05$  and FDR  $q < 0.25$  are listed.

Supplementary Table S4: Gene sets upregulated in TRIM28<sup>KD</sup> xenografts compared with control xenografts

| No. | NAME OF GENE SETS                                             | SIZE | ES    | NES          | NOM p-val    | FDR q-val |
|-----|---------------------------------------------------------------|------|-------|--------------|--------------|-----------|
| 1   | SRP_DEPENDENT_COTRANSLATIONAL_PROTEIN_TARGETING_TO_MEMBRANE   | 15   | 0.556 | <b>2.611</b> | <b>0.000</b> | 0.001     |
| 2   | TRANSLATION                                                   | 18   | 0.501 | <b>2.523</b> | <b>0.000</b> | 0.001     |
| 3   | 3_UTR_MEDIATED_TRANSLATIONAL_REGULATION                       | 16   | 0.493 | <b>2.344</b> | <b>0.000</b> | 0.003     |
| 4   | INFLUENZA_LIFE_CYCLE                                          | 16   | 0.430 | <b>2.102</b> | <b>0.004</b> | 0.021     |
| 5   | NONSENSE_MEDIATED_DECAY_ENHANCED_BY_THE_EXON_JUNCTION_COMPLEX | 15   | 0.462 | <b>2.091</b> | <b>0.000</b> | 0.018     |
| 6   | METABOLISM_OF_MRNA                                            | 29   | 0.288 | <b>1.834</b> | <b>0.013</b> | 0.079     |
| 7   | MHC_CLASS_II_ANTIGEN_PRESENTATION                             | 18   | 0.357 | <b>1.813</b> | <b>0.012</b> | 0.075     |
| 8   | METABOLISM_OF_PROTEINS                                        | 59   | 0.195 | <b>1.732</b> | <b>0.012</b> | 0.101     |
| 9   | TRANSCRIPTIONAL_REGULATION_OF_WHITE_ADIPOCYTE_DIFFERENTIATION | 15   | 0.359 | <b>1.664</b> | <b>0.036</b> | 0.128     |

ES, GSEA enrichment score; NES, GSEA normalized enrichment score; FDR, false discovery rate. Only gene sets that show  $p < 0.05$  and FDR  $q < 0.25$  are listed.
